# Supplementary material for: Correlation of Syndecan-1 levels with adjunct hematological markers of sepsis in preterm newborns with and without exposure to maternal chorioamnionitis
Source: Research Square preprint supplement (doi:10.21203/rs.3.rs-8321567/v1), 2026-01-13
Supplement: Supplementary file 1 [file 8c5f983c72519620764f8e25.xlsx]

## Sheet: Sheet1
Preterm Newborn number	Gestational Age (weeks)	Birthweight (kg)	CA and Funisitis status	Syndecan Level	GBS status**	WBC (units)	Bands (units)	Segmentation	Left shift status	Neutropenia status
1	31	unknown	No CA	157.5	unknown	11	2	28
2	28	unknown	No CA	128.43	unknown	7	0	18
3	27	unknown	No CA	105.35	unknown	2.8	0	25		positive
4	27	unknown	No CA	170.26	unknown	4	0	41		positive
5	31	unknown	No CA	67.81	unknown	12	0	46
6	29	1.19	No CA	117.88	unknown	4.6	7	23		positive
7	31	1.31	No CA	108.8	unknown	8	7	26
8	30	0.94	No CA	102.71	negative	6.7	0	57
9	25	0.85	No CA	128.24	unknown	4.8	0	18		positive
10	25	0.77	No CA	142.08	unknown	5.6	2	22
11	28	1.3	No CA	143.49	unknown	5.5	5	53
12	31	1.95	No CA	98.17	positive	8.5	3	24
13*	31	0.428	No CA	215.63	negative	4.7	1	16		positive
14	30	1.74	No CA	246.6	unknown	5.7	0	16
15	24	0.51	No CA	341.97	negative	2.4	0	21		positive
16	30	1.06	No CA	180.56	unknown	3	0	26		positive
17	29	1.52	No CA	164.01	negative	5.6	0	50
18	31	1.34	No CA	160.03	unknown	7.7	1	41
19	25	0.72	No CA	176.59	unknown	7.5	0	66
20	25	0.62	No CA	352.3	unknown	6.6	0	44
21	26	0.95	No CA	348.74	unknown	15	2	61
22*	31	1.42	No CA	107.63	negative	9	1	31
23	30	1.35	No CA	219.71	unknown	4.3	0	24		positive
24	26	0.93	No CA	212.69	negative	3.8	2	27		positive
25	30	1.38	No CA	122.18	unknown	3.2	0	25		positive
26	30	1.16	No CA	119.56	unknown	2.1	0	20		positive
27	30	1.35	No CA	183.41	unknown	2.3	0	20		positive
28	31	1.43	No CA	54.52	unknown	6.8	2	32
29	31	1.22	No CA	102.21	unknown	5.1	2	37
30	29	unknown	CA	210.5	unknown	12	0	15
31	29	unknown	CA	175.61	unknown	10	1	15
32	24	unknown	CA	147.82	unknown	10	14	27	positive
33	27	unknown	CA	94.07	unknown	5.4	3	35
34	27	0.86	CA	266.31	negative	6.7	5	32
35	29	1.35	CA	241.95	negative	5.8	1	27
36	30	1.37	CA	388.81	unknown	2.7	9	39		positive
37	26	0.66	CA	221.61	negative	7.6	15	58	positive
38	26	0.66	CA	217.73	unknown	7.6	15	58	positive
39	27	0.68	CA	323.35	unknown	2.4	1	29		positive
40	23	unknown	CA	258.98	positive	21	6	63
41	30	1.45	CA	74.36	unknown	8.7	0	50
42	23	0.75	CA	252.13	unknown	6.2	4	31
43	25	unknown	CA with Funisitis	367.02	unknown	4	14	20	positive	positive
44	25	unknown	CA with Funisitis	371.7	unknown	10	24	33	positive
45	25	unknown	CA with Funisitis	371.7	negative	37	40	26	positive
46	25	0.77	CA with Funisitis	535.31	unknown	4.8	9	18	positive	positive
47	28	1.3	CA with Funisitis	451.8	unknown	19	10	61	positive
48	29	1.68	CA with Funisitis	161.8	positive	13	25	26	positive
49	23	0.54	CA with Funisitis	535.31	unknown	15	9	2	positive
50	29	unknown	CA with Funisitis	137.69	positive	35	0	50
51	25	0.92	CA with Funisitis	298.89	positive	14	4	48
52	25	0.78	CA with Funisitis	204.12	unknown	35	4	50
53	27	0.74	CA with Funisitis	122.09	unknown	19	11	29	positive
54	27	1.08	CA with Funisitis	132.48	unknown	1.9	11	4	positive	positive
55	31	1.89	CA with Funisitis	276.51	negative	30	4	57
56	26	0.86	CA with Funisitis	69.15	positive	22	0	71
	*Preterm neonates did not receive antibiotics as they were delivered strictly for maternal reasons
	**GBS status is unknown for most patients as it is not routinely drawn until 36 weeks of GA
