# Supplementary material for: Correlation of Syndecan-1 levels with adjunct hematological markers of sepsis in preterm newborns with and without exposure to maternal chorioamnionitis
Source: Research Square preprint supplement (doi:10.21203/rs.3.rs-8321567/v1), 2026-01-13
Supplement: Supplementary file 1 [file d9f8f3eefef541187ae2218e.pdf]

**Table 1:** Comparison of incidence of left shift and neutropenia in unexposed PN vs. PN exposed to CA

|               | N  | Left Shift | Neutropenia |
|---------------|----|------------|-------------|
| Unexposed PN  | 29 | 0          | 12          |
| CA-exposed PN | 27 | 12         | 5           |
| p-value       |    | < 0.001    | 0.08        |

**Table 2:** PN with a left shift differentiated by CA only and CA with FIRs/funisitis

|                   | N  | Left Shift |
|-------------------|----|------------|
| CA only           | 13 | 3          |
| CA with funisitis | 14 | 9          |
| p-value           |    | 0.054      |
